# Supplementary material
Source: PubMed Central journal article supplement (PMC7145738)
Supplement: NIHMS1565508-supplement-Short_In_Vivo_Checklist.pdf [file NIHMS1565508-supplement-Short_In_Vivo_Checklist.pdf]

**\* Short In Vivo Checklist**

*AHA - Preclinical Animal Testing: Prevention of bias is important for experimental cardiovascular research. **This short checklist must be completed, and the answers should be clearly presented in the manuscript as well.** The checklist will be used by reviewers and editors but will not be published. If a revision is requested, you will be required to complete at revision submission a more detailed checklist that will be published with the accepted article.*

*This study involves animals:*

Yes

**Animals**

Species, age, sex, strains, and sources of animals are described: Yes

**Randomization**

Randomization and allocation concealment were performed: Yes

**Blinding**

Blinding was performed: No

**Inclusions and Exclusions (a)**

Specific criteria for inclusions and exclusions are specified: N/A

**Inclusions and Exclusions (b)**

Criteria for inclusions and exclusions were set before the study: N/A

**Reporting of Excluded Animals**

All animals excluded after the randomization are reported: N/A

**Statistical Methods**

Statistical Methods are described: Yes

---

Date completed: 02/20/2020 14:22:17

User pid: 3042
